# Supplementary material for: Entangling Credit and Funding Shocks in Interbank Markets
Source: PubMed Central journal article supplement (PMC4999134; doi:10.1371/journal.pone.0161642), 2016-08-25
Supplement: pone.0161642.s001.pdf [file pone.0161642.s001.pdf]

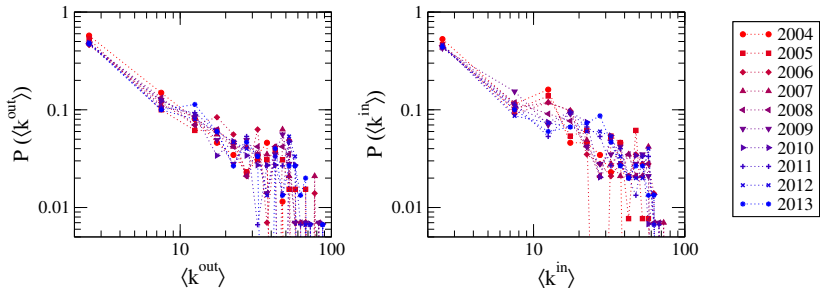

**S1 Fig. Probability distributions for the average number of outgoing and incoming connections of banks, for years from 2004 to 2013.** For each bank  $i$ , the number of outgoing links is the number of debtors of  $i$ , namely its *out-degree*, and is defined as  $k_i^{out} = \sum_j a_{ij}$ . Analogously, the number of incoming links is the number of creditors of  $i$ , namely its *in-degree*, defined as  $k_i^{in} = \sum_j a_{ji}$ . Using eq. (2) of the main text, we get  $\langle k_i^{out} \rangle = \sum_j p_{ij} = \sum_j (A_i L_j) / (z^{-1} + A_i L_j)$  and  $\langle k_i^{in} \rangle = \sum_j p_{ji} = \sum_j (A_j L_i) / (z^{-1} + A_j L_i)$ .
