# Supplementary material for: Entangling Credit and Funding Shocks in Interbank Markets
Source: PubMed Central journal article supplement (PMC4999134; doi:10.1371/journal.pone.0161642), 2016-08-25

S2 File. Slideshow with results of group DS Rank for years from 2004 to 2013.

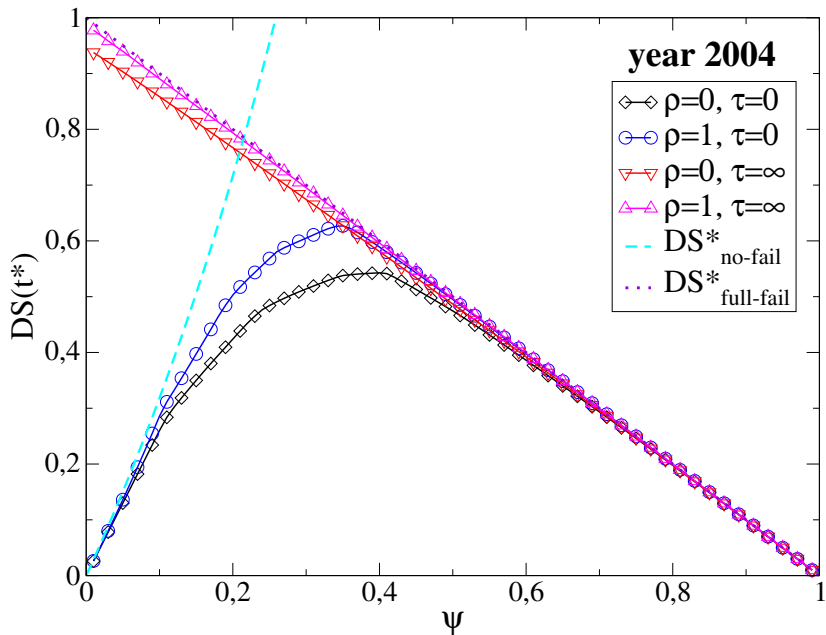

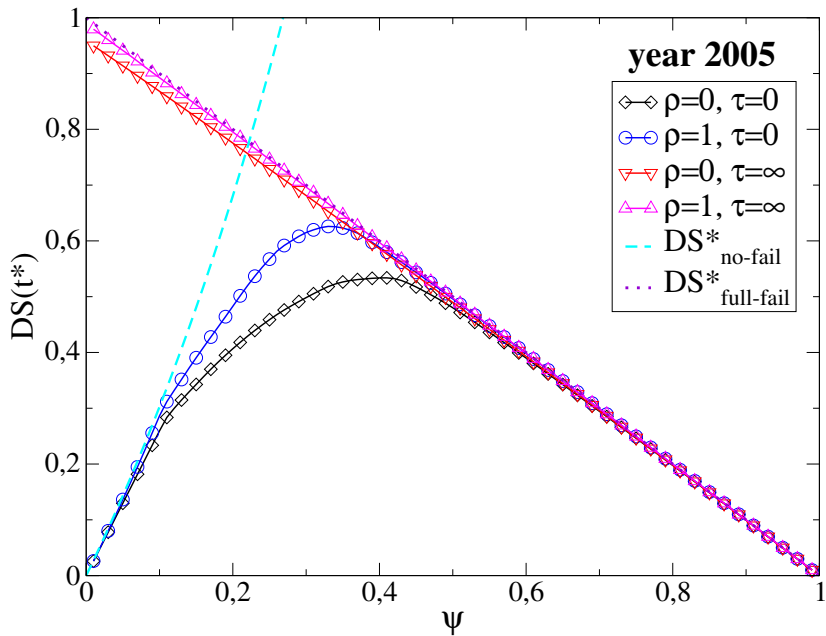

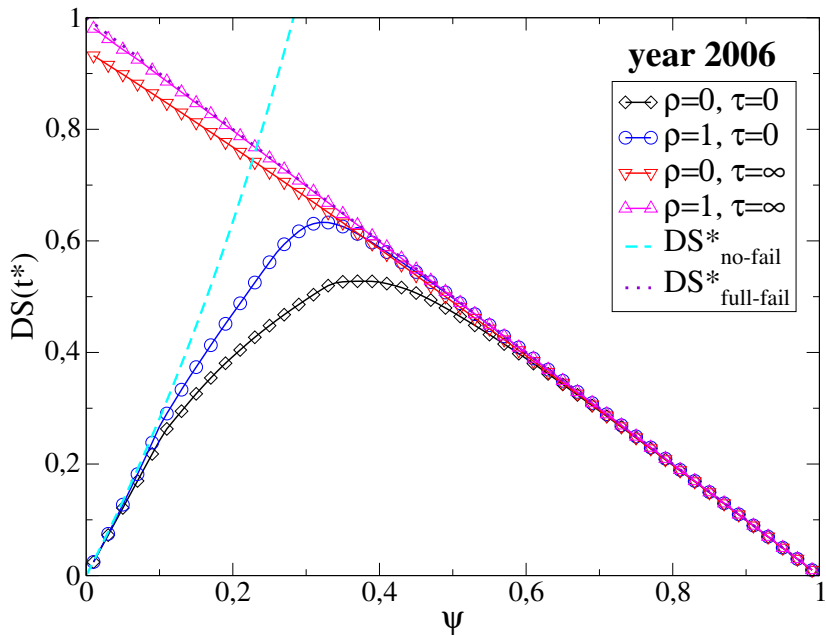

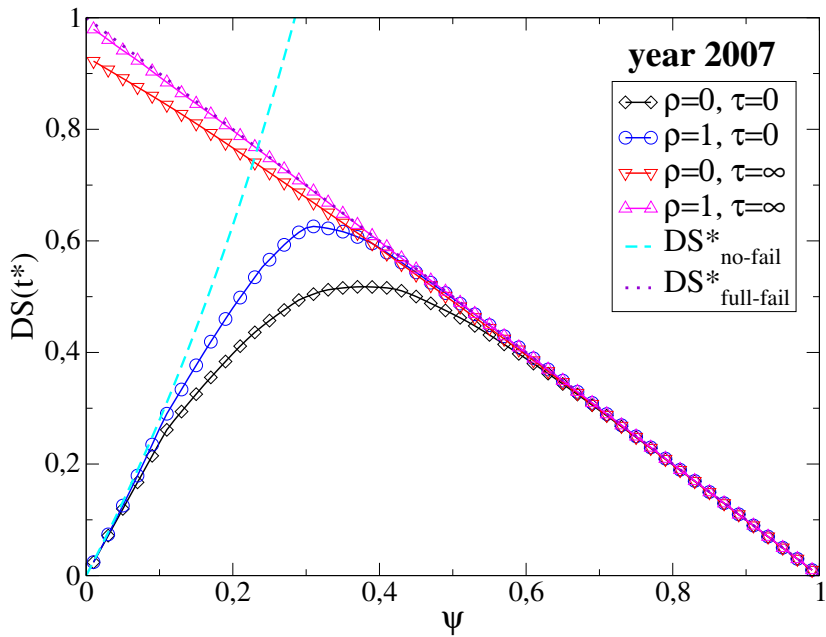

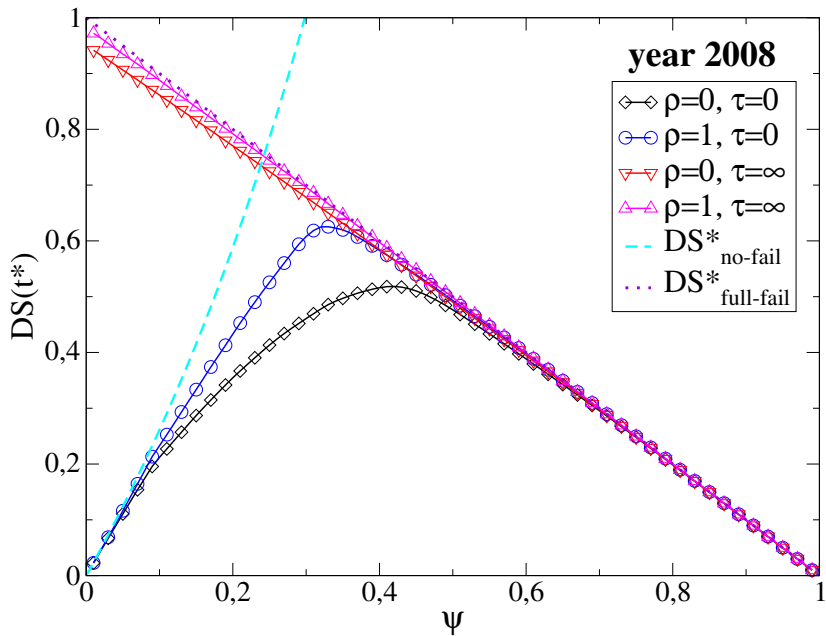

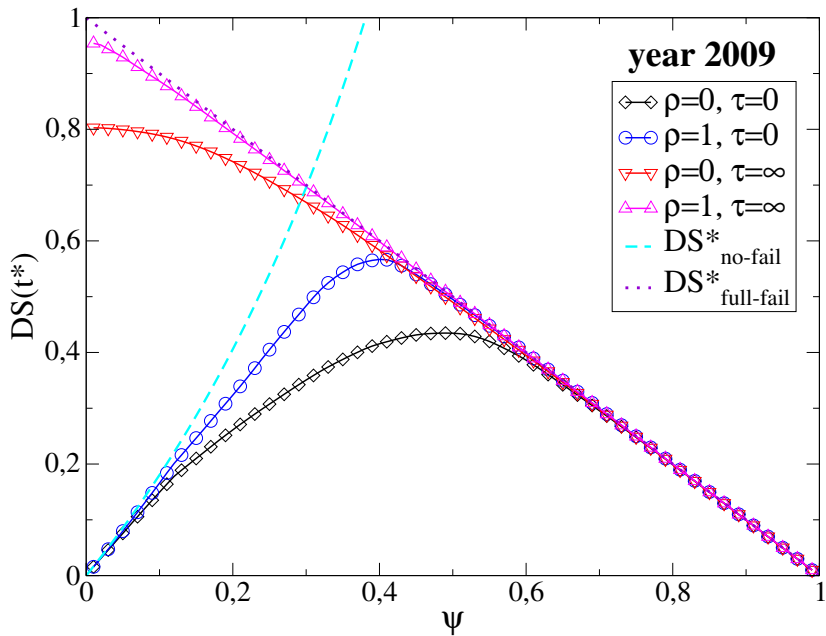

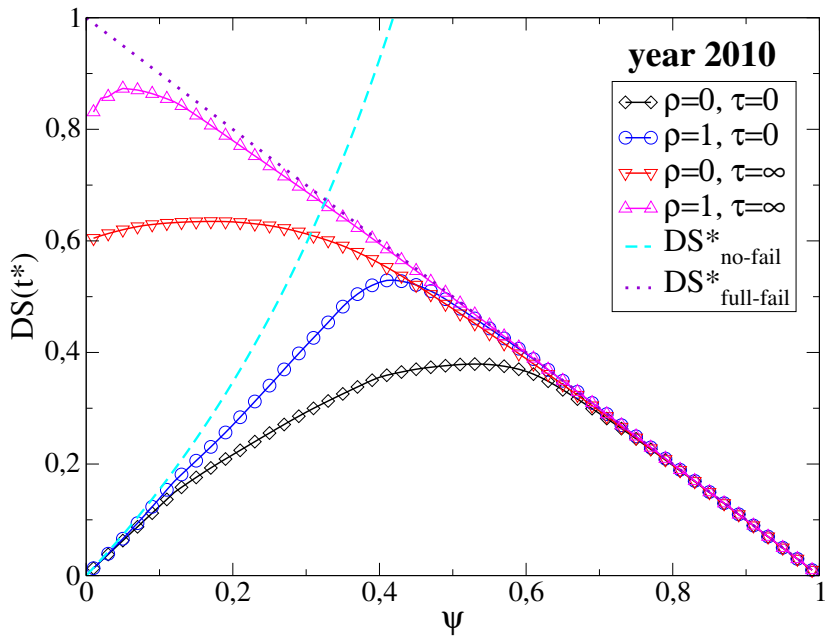



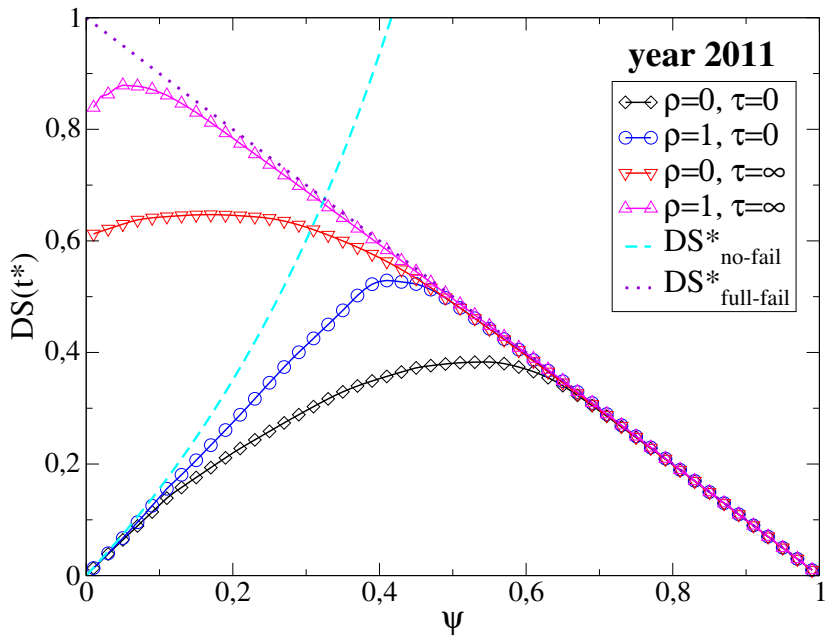

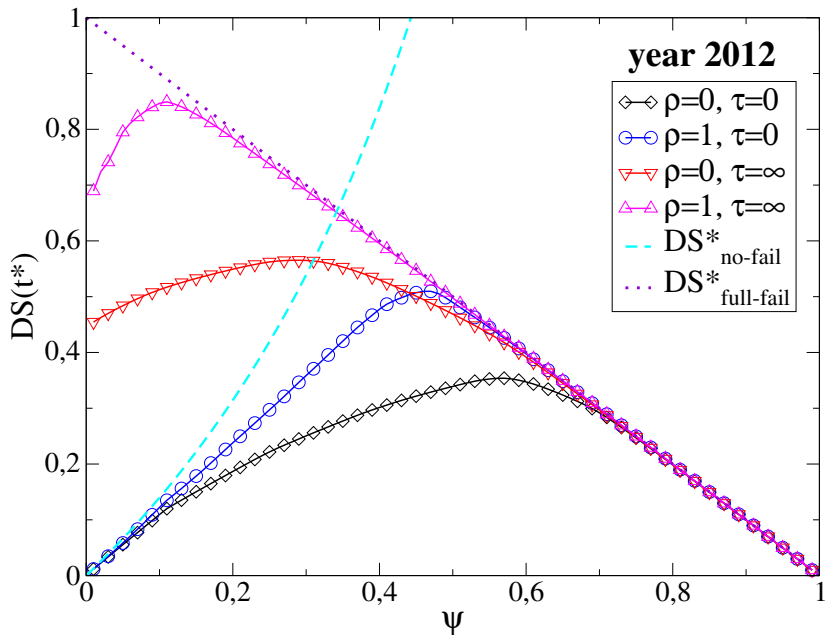

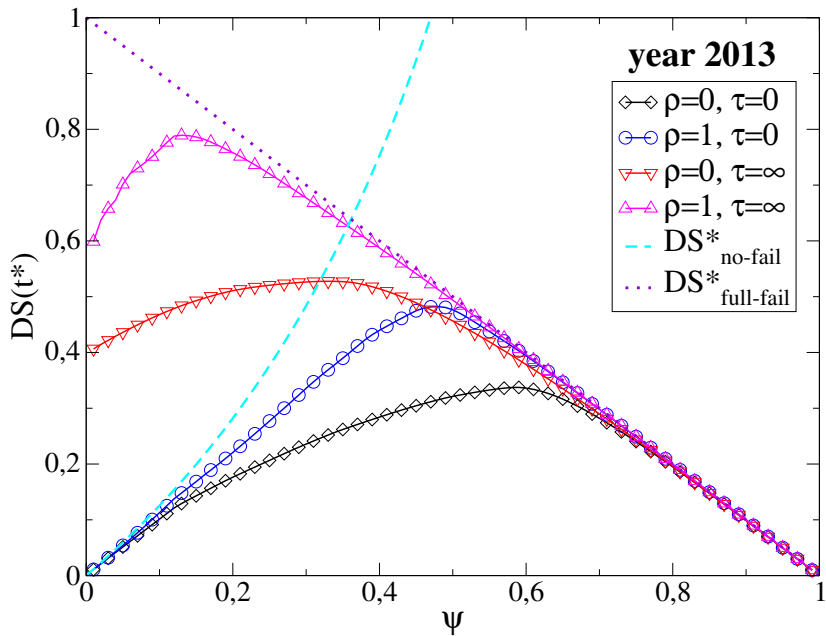

Supplement: pone.0161642.s002.pdf [file pone.0161642.s002.pdf]
