# Supplementary material for: Entangling Credit and Funding Shocks in Interbank Markets
Source: PLoS One. 2016 Aug 25;11(8):e0161642. doi: 10.1371/journal.pone.0161642 (PMC4999134; doi:10.1371/journal.pone.0161642)
Supplement: S2 File — (PDF) [file pone.0161642.s003.pdf]

S2 File. Slideshow with scatter plots of impact and vulnerability of individual banks for years from 2004 to 2013.

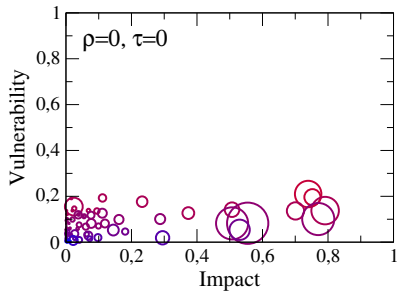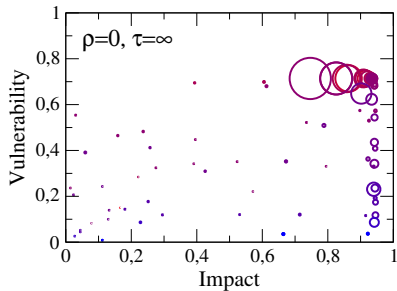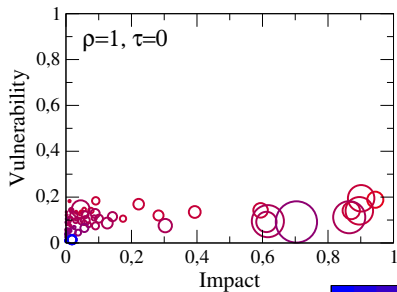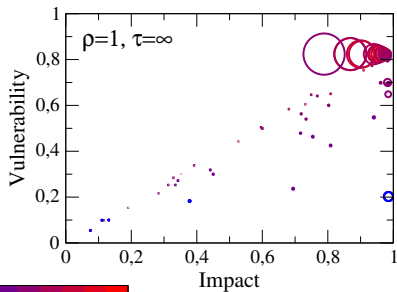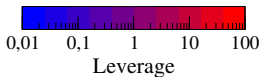

year 2004

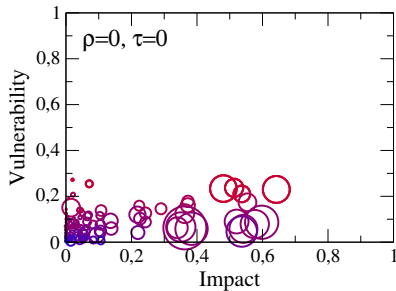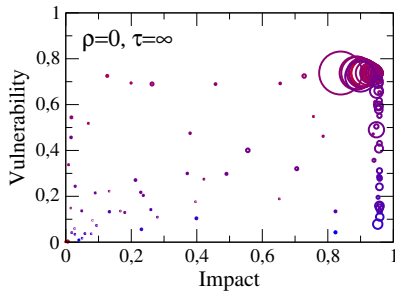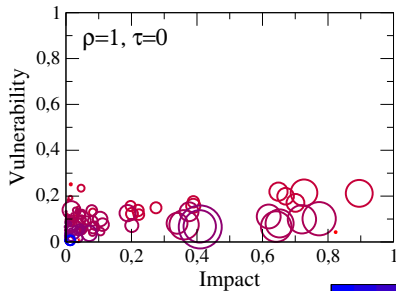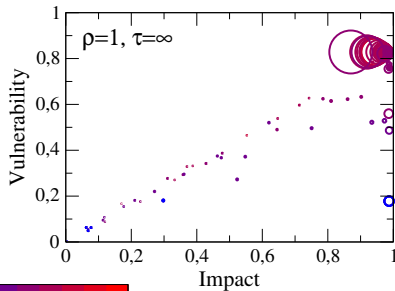

year 2005

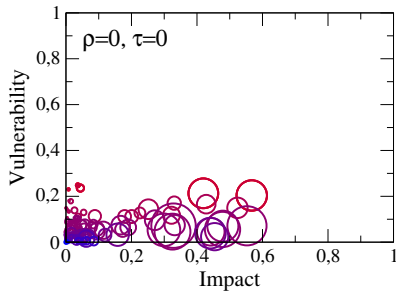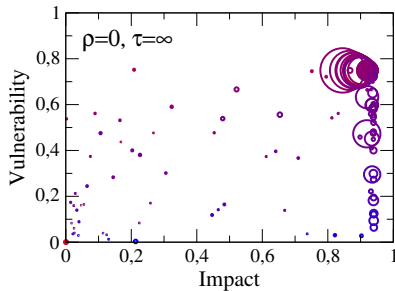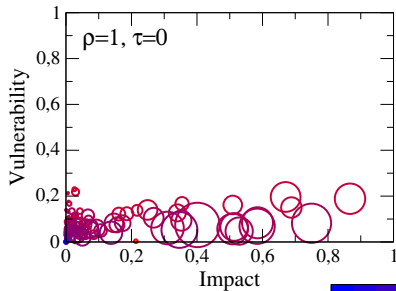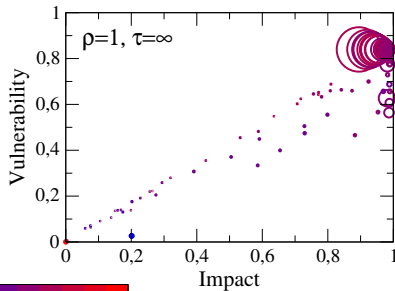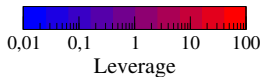

year 2006

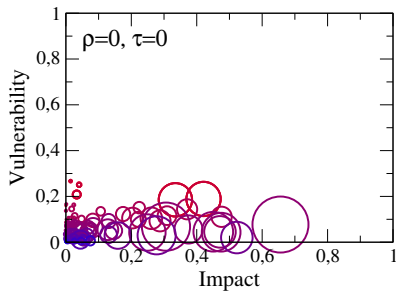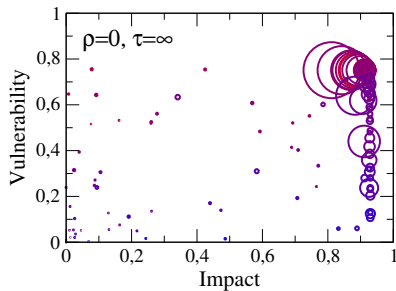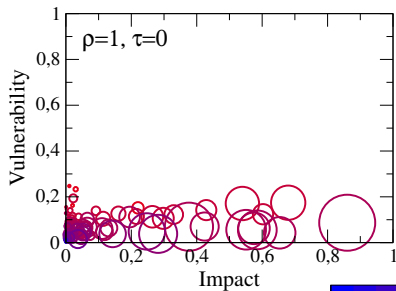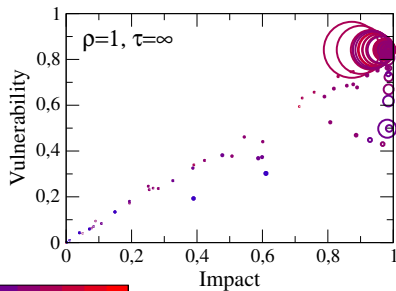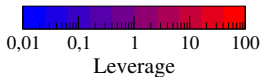

year 2007

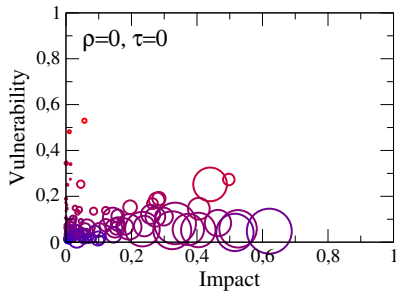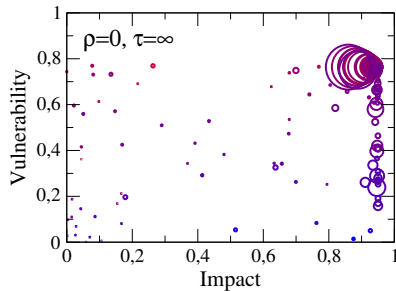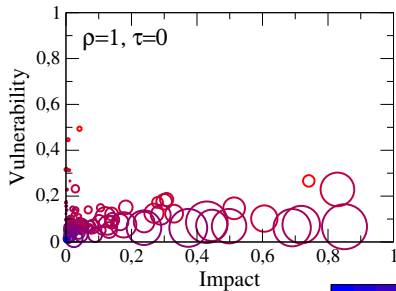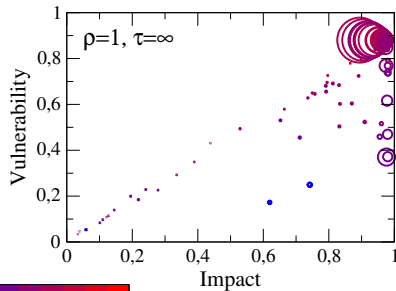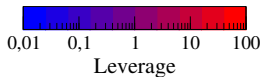

year 2008

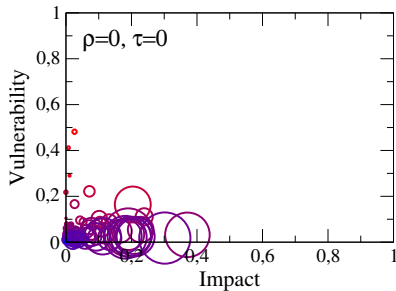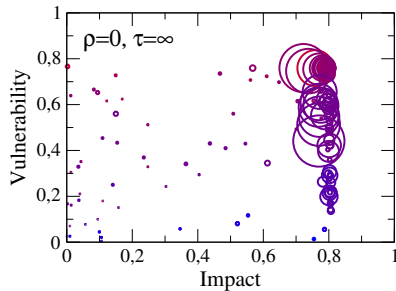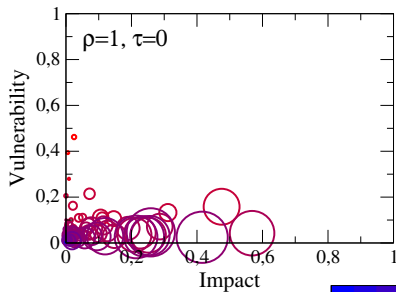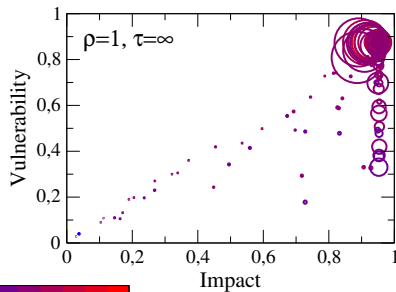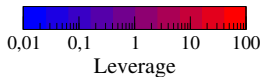

year 2009

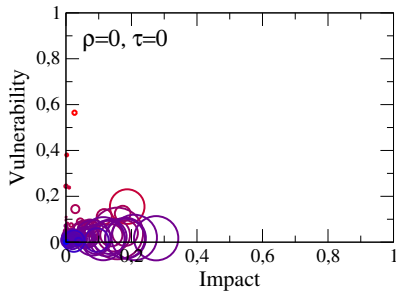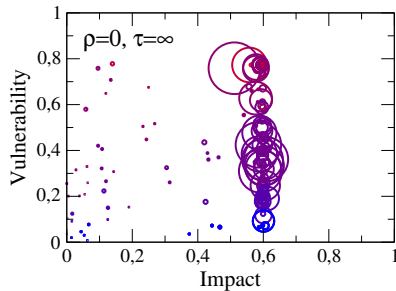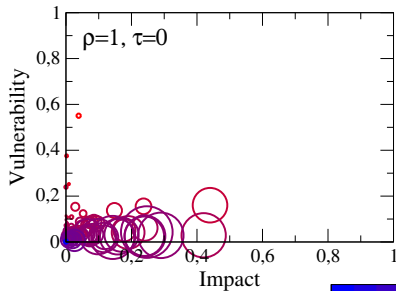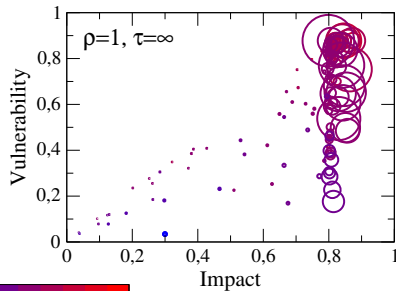

year 2010

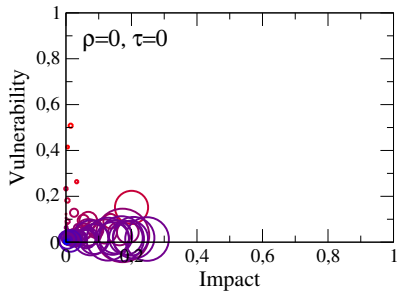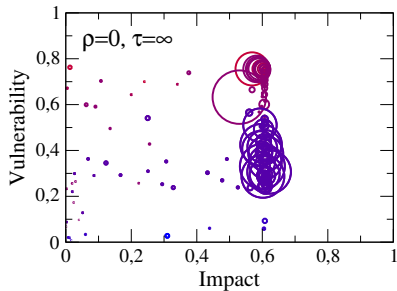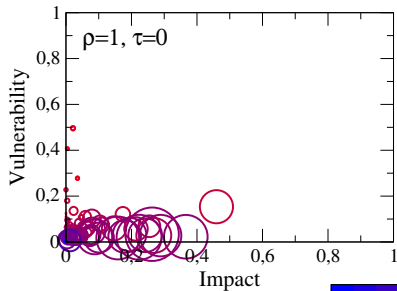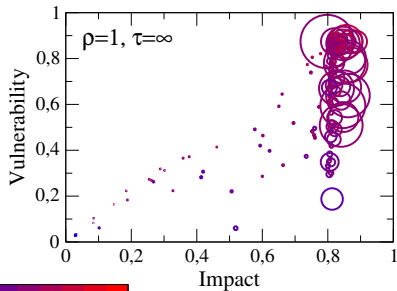

year 2011

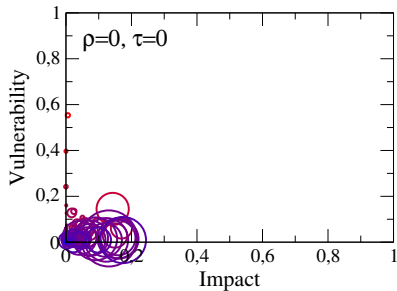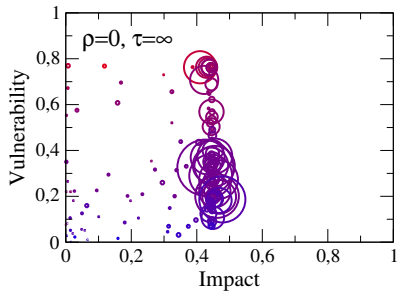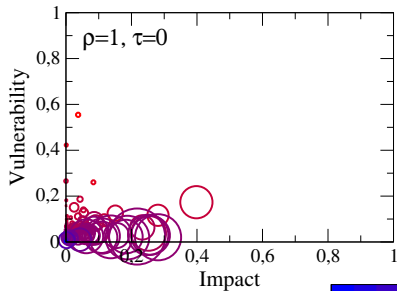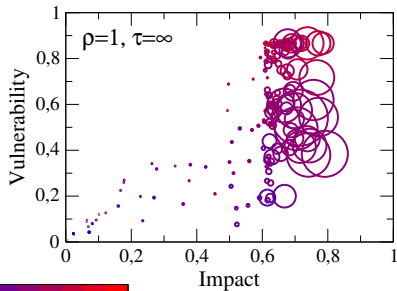

year 2012

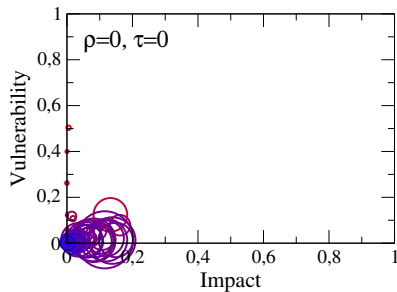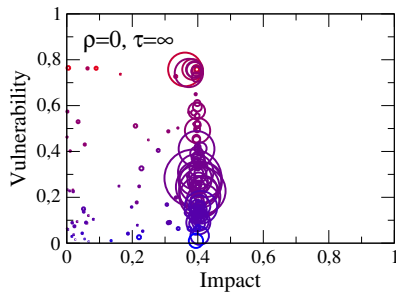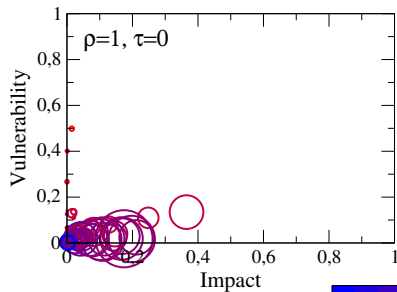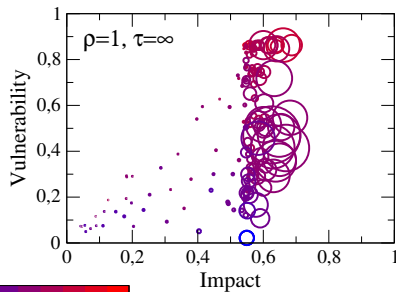

year 2013
